# Supplementary material for: Natural Compounds as Non-Nucleoside Inhibitors of Zika Virus Polymerase through Integration of In Silico and In Vitro Approaches
Source: MDPI journal article supplement (doi:10.3390/ph15121493), 2022-11-30
Supplement: s1 [file s1]

## **Supplementary Material for**

### **Natural compounds as non-nucleoside inhibitors of Zika virus polymerase through integration of *in silico* and *in vitro* approaches**

Paulo Ricardo Pimenta da Silva Ramos<sup>1‡</sup>; Melina Mottin<sup>1‡</sup>; Caroline Sprengel Lima<sup>2</sup>; Letícia R. Assis<sup>2</sup>; Ketllyn Zagato de Oliveira<sup>3</sup>; Nathalya Cristina de Moraes Roso Mesquita<sup>3</sup>; Natasha Marques Cassani<sup>4</sup>; Igor Andrade Santos<sup>4</sup>; Joyce Villa Verde Bastos Borba<sup>1</sup>; Vinícius Alexandre Fiaia Costa<sup>1</sup>; Bruno Junior Neves<sup>1</sup>; Rafael Victorio Carvalho Guido<sup>3</sup>; Glaucius Oliva<sup>3</sup>; Ana Carolina Gomes Jardim<sup>4</sup>; Luis Octávio Regasini<sup>2\*</sup>; Carolina Horta Andrade<sup>1\*</sup>

<sup>‡</sup> P. R. P. S. Ramos and M. Mottin contributed equally to this work.

#### **\*Corresponding authors**

**E-mail addresses:** carolina@ufg.br (C. H. Andrade), luis.regasini@unesp.br (L.O. Regasini).

<sup>1</sup>LabMol- Laboratory for Molecular Modeling and Drug Design, LabMol, Faculdade de Farmácia, Universidade Federal de Goiás, Goiânia, GO, Brazil

<sup>2</sup>Laboratory of Antibiotics and Chemotherapeutics (LAC), Institute of Biosciences, Humanities and Exact Sciences, São Paulo State University (Unesp), São José do Rio Preto, SP, Brazil

<sup>3</sup>LaBEFar - Laboratory of Structural Biology and Drugs, Institute of Physics of São Carlos, University of São Paulo, São Carlos, Brazil

<sup>4</sup>Laboratory of Antiviral Research, Institute of Biomedical Science, ICBIM, Federal University of Uberlandia, Uberlândia, MG, Brazil

## Supplementary Figures

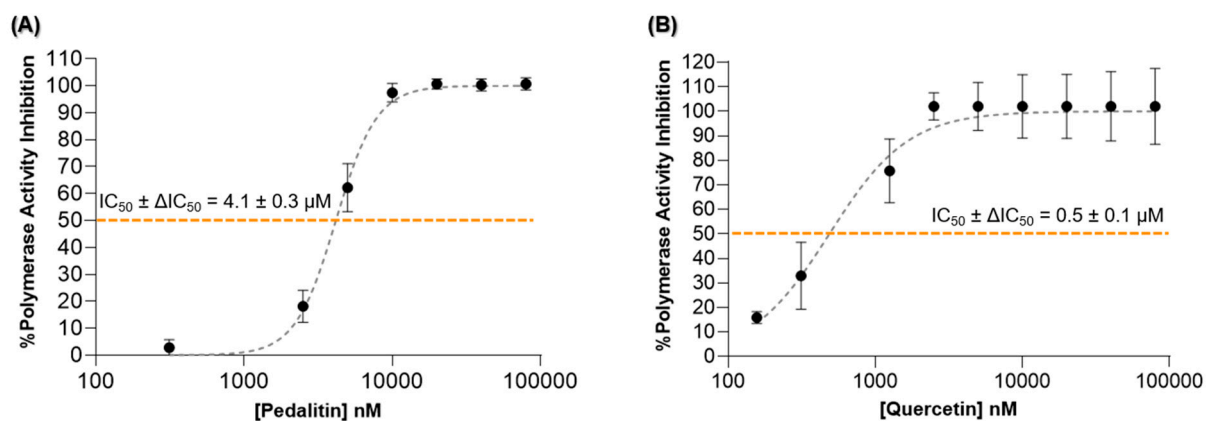

**Figure S1.** ZIKV NS5 RdRp enzymatic assays. Concentration-response curves adjusted with Hill to determine  $IC_{50} \pm \Delta IC_{50}$  values for **A)** pedalitin and **B)** quercetin.

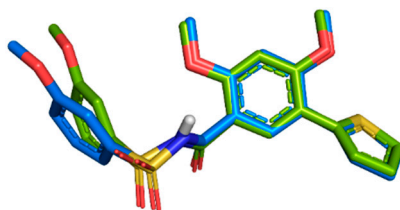

**Figure S2.** Superposition of the co-crystallized 5-(3-fluorothiophen-2-yl)-2-hydroxy-4-methoxy-N-[4-(trifluoromethyl)benzenesulfonyl]benzamide compound in crystal (C atoms are represented in blue) and the redocking pose (C atoms are represented in green) at the ZIKV NS5 RdRp structure (PDB ID 6LD4 [21]).

## Supplementary Tables

**Table S1: Docking results for all compounds selected by chemical space analysis**

| Compound                                                                            | SMILES                                                    | Docking score (Kcal·mol <sup>-1</sup> ) | LE*(Kcal·mol <sup>-1</sup> ·non-hydrogen atom <sup>-1</sup> ) |
|-------------------------------------------------------------------------------------|-----------------------------------------------------------|-----------------------------------------|---------------------------------------------------------------|
| 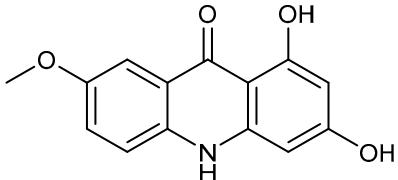   | <chem>OC1CC2[NH]C3C(C(=O)C2C(O)C1)CC(OC)CC3</chem>        | -7.92                                   | 0.42                                                          |
|   | <chem>OC1CC2OC(C(C(=O)C2C(O)C1)O)C1C=C(O)C(O)=CC=1</chem> | -7.74                                   | 0.35                                                          |
|  | <chem>N(C1C(OC)=CC(OC)=CC=1)C1C=CC(OC)=CC=1</chem>        | -8.12                                   | 0.43                                                          |
|  | <chem>N(CC=C(CCC=C(C)C)C)C(NCC=C(CCC=C(C)C)C)C=O</chem>   | -7.65                                   | 0.32                                                          |
|  | <chem>OC1CC2[NH]C3C(C(=O)C2C(O)C1)CCCC3</chem>            | -7.20                                   | 0.42                                                          |
|  | <chem>N(C1C(OC)=CC(OC)=C(OC)C=1)C1C(OC)=CC(C)=CC=1</chem> | -8.43                                   | 0.38                                                          |

|                                                                                     |                                                             |       |      |
|-------------------------------------------------------------------------------------|-------------------------------------------------------------|-------|------|
| 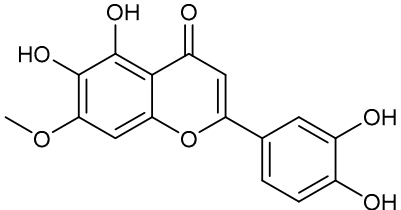   | <chem>OC1C(O)=CC(C2CC(=O)C3C(CC(C(C3O)O)OC)O2)=CC=1</chem>  | -7.94 | 0.35 |
|    | <chem>OC1CC2OC(C3C=CC=CC=3)CC(=O)C2C(O)C1</chem>            | -8.14 | 0.43 |
|    | <chem>OC1=CC2=C(C=C1O)C(=O)C1=CC=CC=C1N2</chem>             | -7.01 | 0.41 |
|   | <chem>N(C1C(OC)=CC(OC)=C(OC)C=1)C1C(OC)=CC(C)=CC=1</chem>   | -8.68 | 0.38 |
|  | <chem>CCCCCOC1=CC2=C(C(O)=C1)C(=O)C1=C(C(O)=CC=C1N2</chem>  | -8.30 | 0.35 |
|  | <chem>CC(C)=CCN(CC=C(C)C)C(N)=N</chem>                      | -6.62 | 0.47 |
|  | <chem>CC(C)=CCNC(=N)NCC=C(C)C</chem>                        | -6.95 | 0.50 |
|  | <chem>CC(C)=CC\C=C(/C)CCN=C(N)N</chem>                      | -7.38 | 0.53 |
|  | <chem>CC(C)=C\C=C\C1(C)CCN=C(N)N1</chem>                    | -7.71 | 0.55 |
|  | <chem>COC1=C(O)C(O)=C2C(=O)C=C(OC2=C1)C1=CC=C(O)C=C1</chem> | -8.36 | 0.38 |

|                                                                                     |                                                                                                                                                                                         |       |      |
|-------------------------------------------------------------------------------------|-----------------------------------------------------------------------------------------------------------------------------------------------------------------------------------------|-------|------|
| 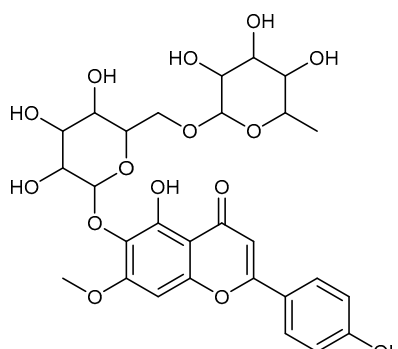   | <chem>COC1=C(OC2OC(CO</chem><br><chem>C3OC(C)C(O)C(O)C3</chem><br><chem>O)C(O)C(O)C2O)C(O)</chem><br><chem>=C2C(=O)C=C(OC2=</chem><br><chem>C1)C1=CC=C(O)C=C1</chem>                    | -7.87 | 0.18 |
|    | <chem>COC1=C(O)C=C(C=C</chem><br><chem>1O)C(=O)OC1C(O)C(</chem><br><chem>C)OC(OC2=C(OC3=C</chem><br><chem>C(O)=CC(O)=C3C2=O</chem><br><chem>)C2=CC=C(O)C=C2)C</chem><br><chem>1O</chem> | -7.72 | 0.18 |
|   | <chem>OCC1OC(OC2=C(OC</chem><br><chem>3=CC(O)=CC(O)=C3C</chem><br><chem>2=O)C2=CC(O)=C(O)</chem><br><chem>C=C2)C(O)C(O)C1O</chem>                                                       | -7.62 | 0.23 |
|  | <chem>OC1OC(OCC2OC(OC</chem><br><chem>3=C(OC4=CC(O)=CC(</chem><br><chem>O)=C4C3=O)C3=CC(</chem><br><chem>O)=C(O)C=C3)C(O)C(</chem><br><chem>O)C2O)C(O)C(O)C1O</chem>                    | -7.97 | 0.19 |
|  | <chem>COC1=C(O)C=CC(\C=</chem><br><chem>C\C(O)=O)=C1</chem>                                                                                                                             | -7.54 | 0.54 |
|  | <chem>CCCCCOC1=CC2=C(</chem><br><chem>C(O)=C1)C(=O)C1=C</chem><br><chem>C=CC(OC)=C1N2</chem>                                                                                            | -8.72 | 0.35 |

|                                                                                   |                                                                                   |       |      |
|-----------------------------------------------------------------------------------|-----------------------------------------------------------------------------------|-------|------|
| 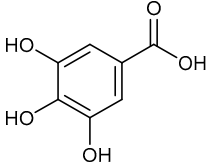 | <chem>OC(=O)C1=CC(O)=C(O)C(O)=C1</chem>                                           | -7.72 | 0.64 |
|  | <chem>COC1=C(OC2OC(CO)C(O)C(O)C2O)C(O)=C2C(=O)C=C(OC2=C1)C1=CC(O)=C(O)C=C1</chem> | -6.99 | 0.21 |
